# Supplementary material for: Double signal amplification based on palladium nanoclusters and nucleic acid cycles on a μPAD for dual-model detection of microRNAs
Source: Royal Society of Chemistry journal article supplement (doi:10.1039/c8tb01552j), 2018-01-01
Supplement: c8tb01552j1.pdf [file c8tb01552j1.pdf]

**Electronic Supplementary Information**

**Double signal amplification based on palladium nanoclusters and nucleic acid  
cycles on  $\mu$ PAD for dual-model detection of microRNAs**

Xuemei Yin<sup>a</sup>, Linlin Liang<sup>a,b</sup>, Peini Zhao<sup>a</sup>, Feifei Lan<sup>a</sup>, Lina Zhang<sup>c\*</sup>, Shenguang Ge<sup>b\*</sup>  
and Jinghua Yu<sup>a</sup>

<sup>a</sup>*School of Chemistry and Chemical Engineering, University of Jinan, Jinan 250022,  
P.R. China*

<sup>b</sup>*Institute for Advanced Interdisciplinary Research, University of Jinan, Jinan 250022,  
P.R. China*

<sup>c</sup>*Shandong Provincial Key Laboratory of Preparation and Measurement of Building  
Materials, University of Jinan, Jinan 250022, P.R. China*

\*Corresponding author: Lina Zhang and Shenguang Ge

E-mail: mse\_zhangln@ujn.edu.cn

E-mail: chm\_gesg@163.com

## 20 **Fabrication and characterization of the $\mu$ PAD**

21       The  $\mu$ PAD was created using a previously reported method with large  
22 modification, and a detailed procedure was described below. Firstly, we selected  
23 whatman chromatography paper #1 (GE Healthcare Worldwide) which was adjusted to  
24 A4 size as the substrate material. Then, Adobe Illustrator CS4 software was employed  
25 to create the shape of hydrophobic barrier on origami device. Subsequently, a  
26 commercially available solid-wax printer (FUJIXEROX Phaser 8560DN, Japan) was  
27 used to put the wax on an A4 #1 paper as the insulation agent (Fig. S1). Finally, the  
28 wax-printed paper sheet was baked in an oven at 130 °C for about 150 s to make the  
29 printed wax melt and penetrate through the paper to form the hydrophobic and  
30 insulating patterns (Fig. S2, S3). This origami device was comprised of a reaction zone,  
31 a fluorescent detection zone and a colorimetric detection zone (Fig. S4A). The paper  
32 sheet was cut into individual origami  $\mu$ PAD for further modification and employment  
33 (Fig. S4B-D).

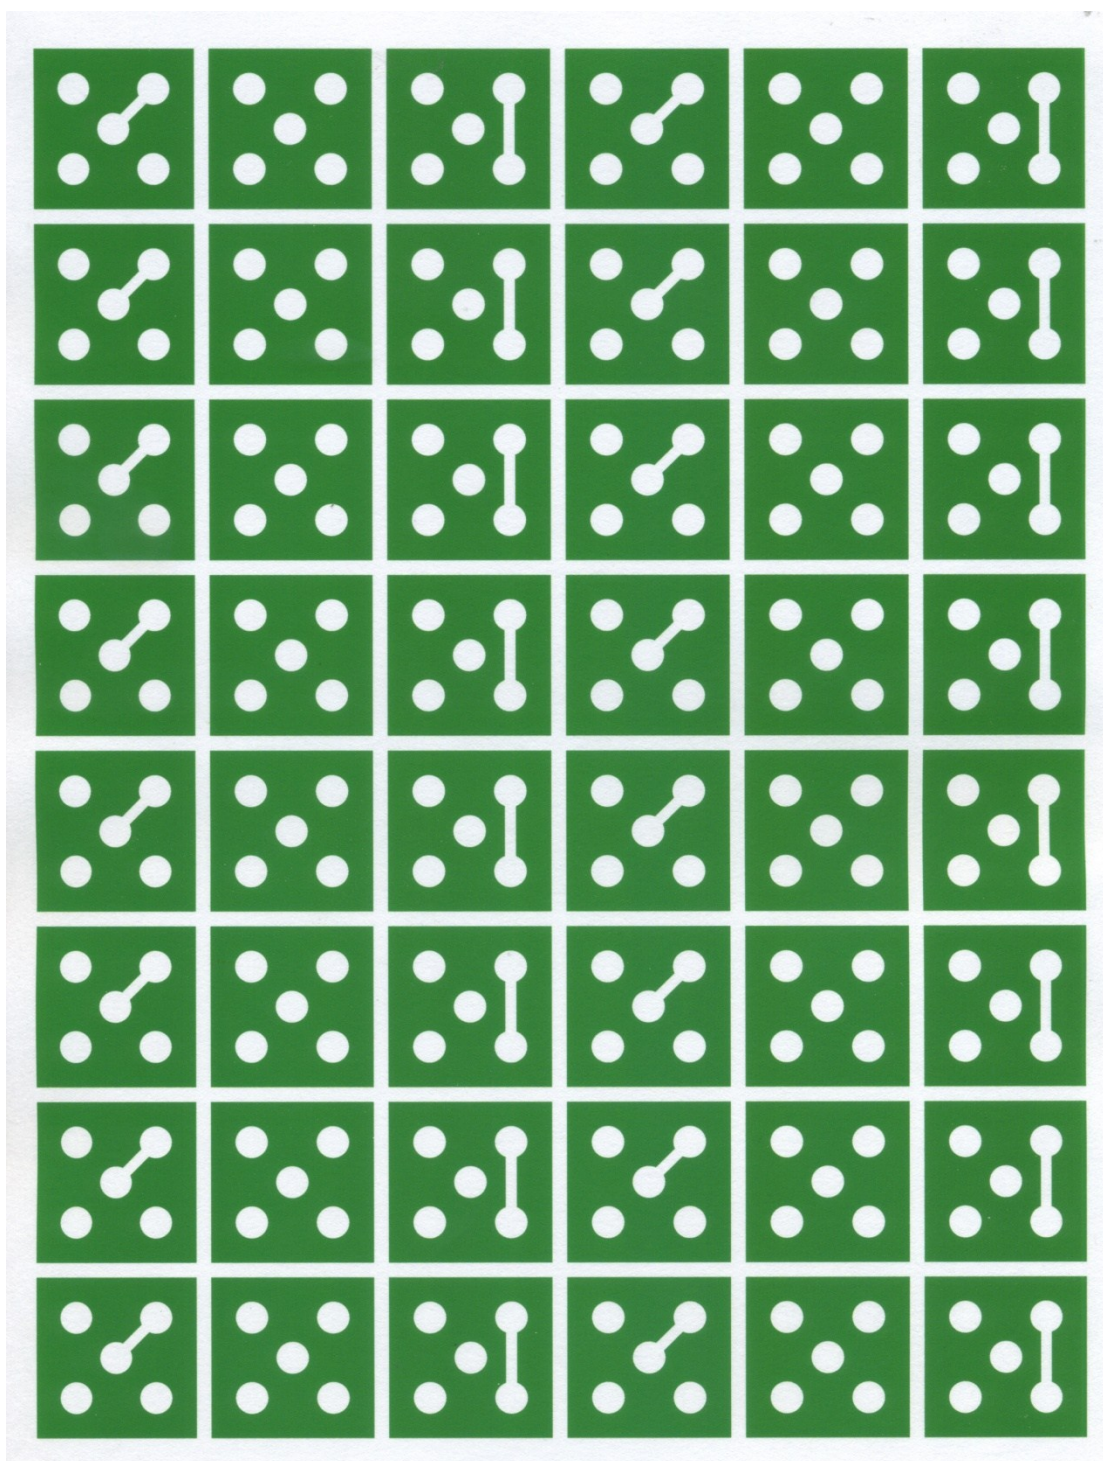

34

35 **Fig. S1** Paper sheets were firstly patterned in bulk using a wax printer.



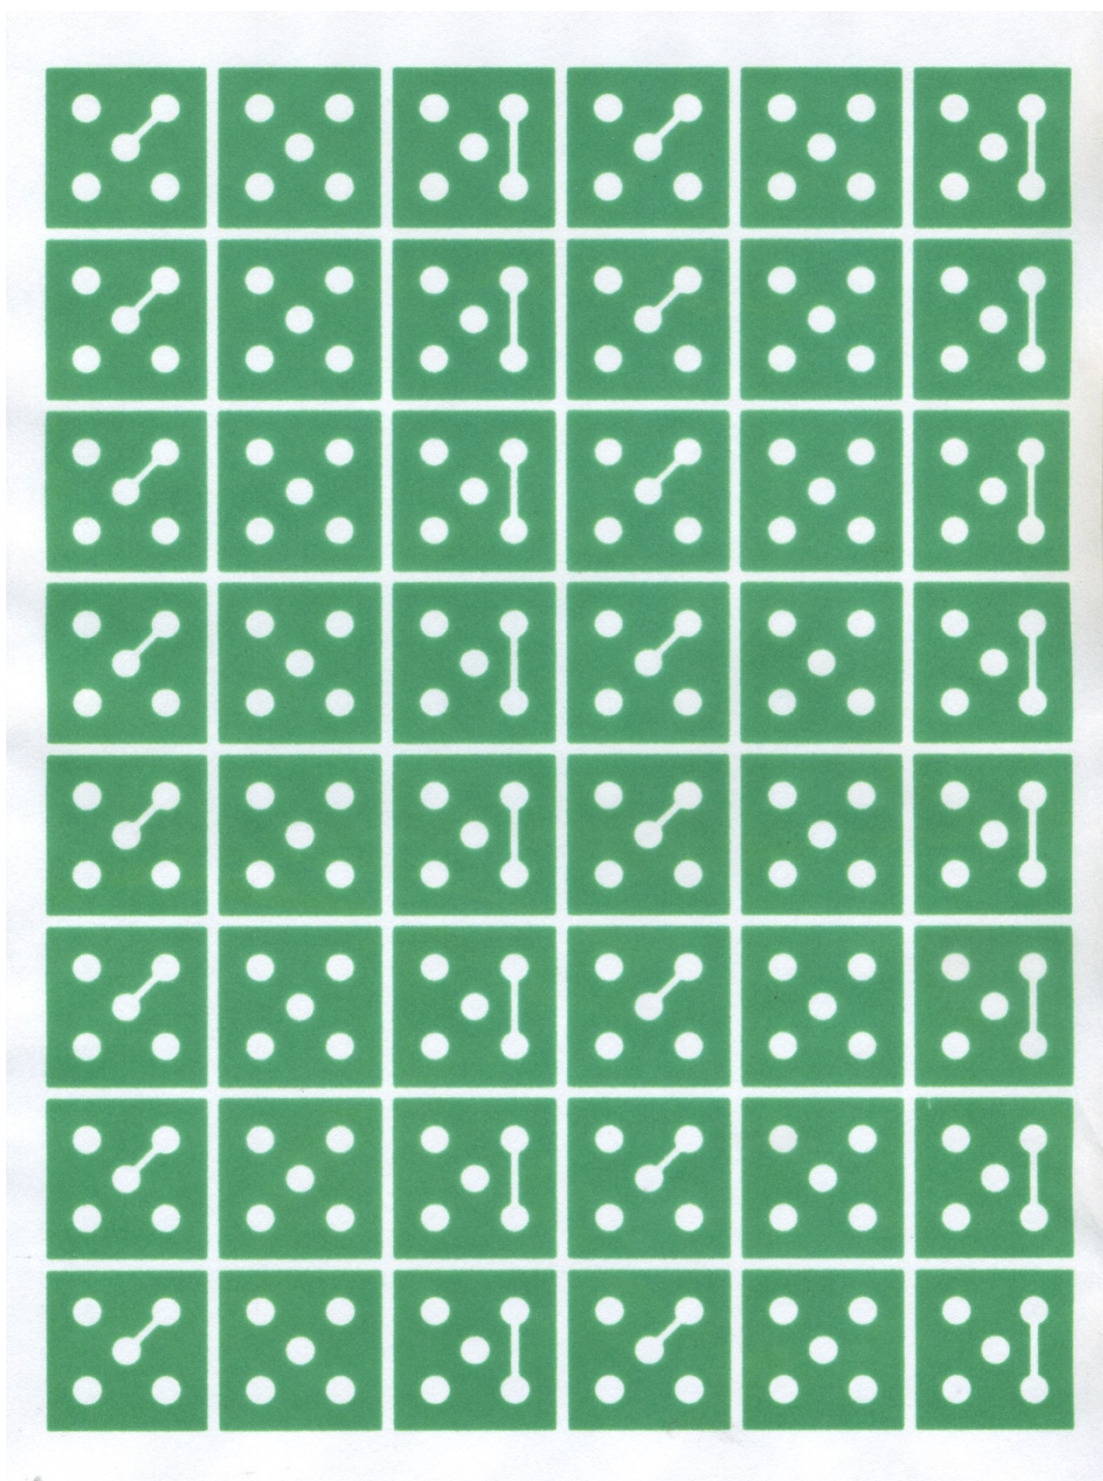

36

37 **Fig. S2** Wax-patterns of the  $\mu$ PAD on a paper sheet (A4) after baking.

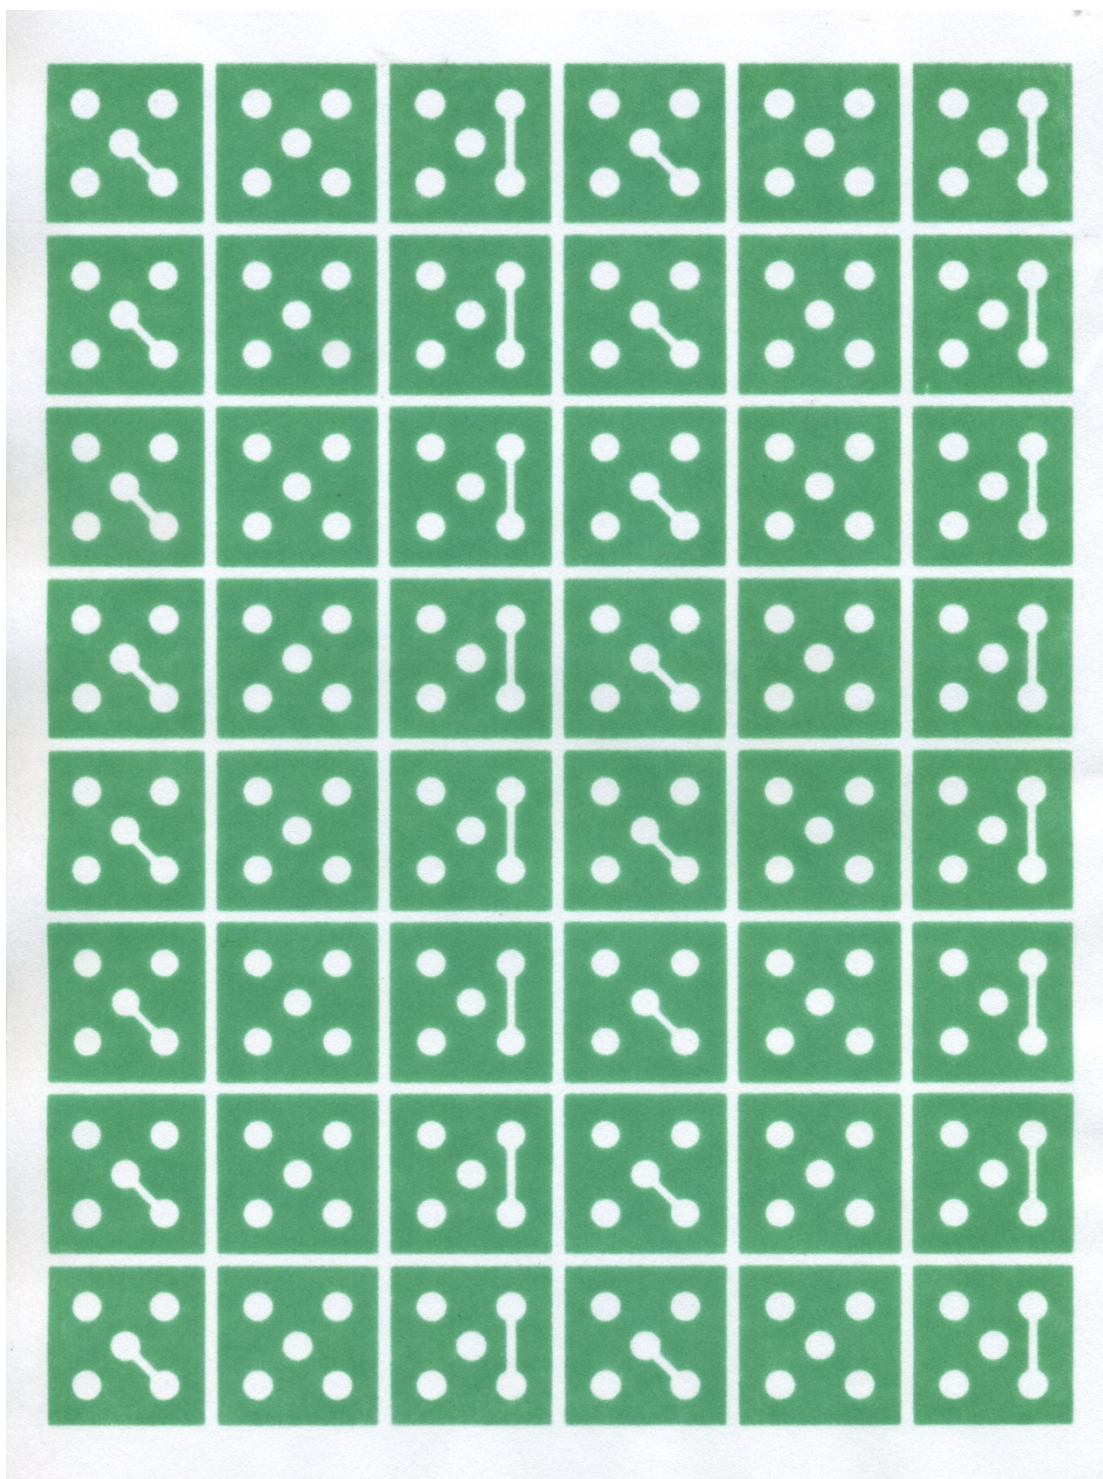

38

39 **Fig. S3** Wax-patterns of the  $\mu$ PAD on a paper sheet (A4) after baking on the reverse side of Fig. S2.



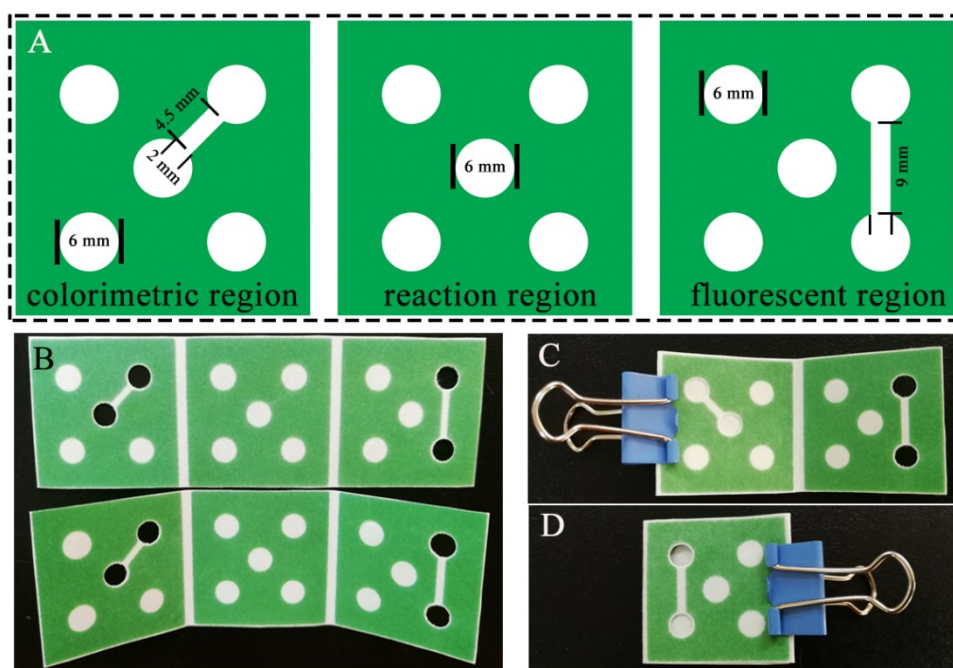

40

41 **Fig. S4** Working regions of the  $\mu$ PAD.

## 42 **The preparation and characterization of Pt- $\mu$ PAD**

43 The influence of the selection of different reductants and the reactant proportion  
 44 on the growth of Pt NPs on the  $\mu$ PAD were received on the Fig. S5 and S6. As showed  
 45 in the Fig. S5, compared with the bare  $\mu$ PAD (Fig. S5A), when ascorbic acid (Fig. S5B)  
 46 and hydroxylamine hydrochloride (Fig. S5C) served as the reducing agent, Pt NPs grew  
 47 less on the surface of the  $\mu$ PAD, especially for ascorbic acid, there was almost no Pt  
 48 NPs. However, with  $\text{NaBH}_4$  as reducing agent,  $\text{H}_2\text{PtCl}_6$  could be commendably reduced  
 49 to generate Pt NPs with the uniform particles and consistent thickness which was  
 50 conducive to further research. Based on the analysis above,  $\text{NaBH}_4$  was chosen as the  
 51 optimum reducing agent for the preparation of Pt- $\mu$ PAD.

52 With  $\text{NaBH}_4$  as the reducing agent, the amount and proportion of  $\text{NaBH}_4$  and  
 53  $\text{H}_2\text{PtCl}_6$  were studied. Figure S6 showed that there was homogenous growth for Pt NPs

54 when the ratio of  $\text{NaBH}_4$  and  $\text{H}_2\text{PtCl}_6$  was 1. For further study, in comparison with the  
 55 dosage of 50  $\mu\text{L}$  (Figure S6A), 100  $\mu\text{L}$  was chosen as the optimal dosage for the growth  
 56 of Pt NPs on  $\mu\text{PAD}$  in this study (Figure S6B). C and D of Figure S6 showed that the  
 57 bigger ratio was, the more serious cracks appeared. Taking the above result into  
 58 account, the choice of  $\text{NaBH}_4$  and  $\text{H}_2\text{PtCl}_6$  was both 50  $\mu\text{L}$  to develop Pt NPs on the  
 59  $\mu\text{PAD}$ .

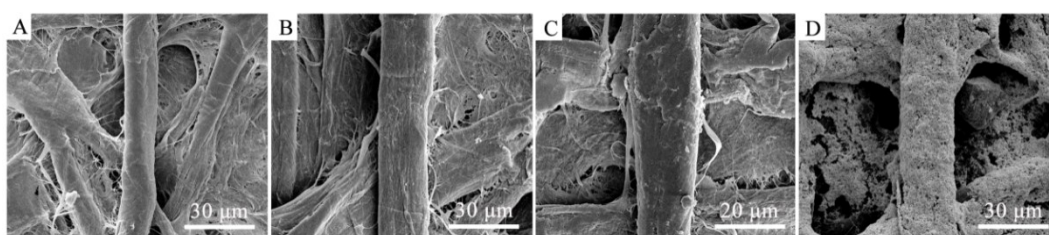

61 **Fig. S5** SEM images of (A) bare paper, (B) ascorbic acid, (C) hydroxylamine hydrochloride, (D)  
 62  $\text{NaBH}_4$

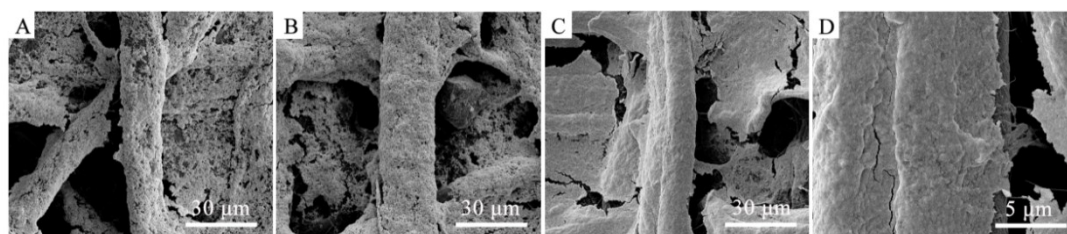

64 **Fig. S6** SEM images of (A) 1:1 of 50  $\mu\text{L}$ , (B) 1:1 of 100  $\mu\text{L}$ , (C) 2:1 of 100  $\mu\text{L}$ , (D) 3:1 of 100  $\mu\text{L}$

## 65 Optimization of the main experimental conditions

66 In our work, DNA-Pd NCs, as a kind of fluorescent agent, were superior to organic  
 67 dyes, and g- $\text{C}_3\text{N}_4$  NSs could act as an efficient fluorescence quencher based on the  
 68 photoinduced electron transfer mechanism or energy transfer mechanism. Therefore,  
 69 we firstly evaluated the fluorescence quenching capability upon different volume of the  
 70 prepared g- $\text{C}_3\text{N}_4$  NSs. As shown in Figure S7A, the fluorescence spectra in the presence

71 of different level of g-C<sub>3</sub>N<sub>4</sub> NSs was received. The image showed that fluorescence  
72 intensity of Pd NCs gradually decreased with the increase of the volume of g-C<sub>3</sub>N<sub>4</sub> NSs,  
73 which indicated that Pd NCs were adsorped on the surface of g-C<sub>3</sub>N<sub>4</sub> NSs efficiently.  
74 Among them, 100  $\mu$ L g-C<sub>3</sub>N<sub>4</sub> NSs (2 mg/mL) could achieve to quench almost the full  
75 fluorescence of Pd NCs. Therefore, in the subsequent detection of miRNAs, 100  $\mu$ L g-  
76 C<sub>3</sub>N<sub>4</sub> NSs were used for this research.

77 For acquiring the optimal analytical performance, the influence factors such as pH,  
78 temperature, and the concentration of H<sub>2</sub>O<sub>2</sub> which peroxidase and mimetic peroxidase  
79 shared in commom, as well as incubation time were investigated, respectively. Firstly,  
80 the relation between the catalytic activity of Pd NCs and pH was studied in the range  
81 of pH 3.8-8.0. Figure S7B indicated the optimal catalytic activity of Pd NCs was  
82 obtained at pH 4.8. The effect of temperature on catalytic activity of the Pd NCs was  
83 studied in the range of 15 to 60  $^{\circ}$ C, as shown in curve a of Figure S7C, the optimal  
84 catalytic temperature was about 28  $^{\circ}$ C. In the following fluorescent and colorimetric  
85 measurements, the temperature also played an important part, curve b of Figure S7C  
86 showed that the oxidized product had slight characteristic absorbance with variation in  
87 temperature. From the above, to ensure the accuracy and convenience, we chose the  
88 room temperature as experimental temperature. The concentration of H<sub>2</sub>O<sub>2</sub> would also  
89 produce an effect on the characteristic absorbance of the oxidized product, as shown in  
90 Figure S7D, within the scope of 0.5% to 3.5% (v/v), we obtained the maximum catalytic  
91 activity in 2 % of H<sub>2</sub>O<sub>2</sub> with TMB arriving as a substrate. At last, we conducted a  
92 research about incubation time in the proposed biosensor influencing on experimental



93 performance. As showed in Figure S7E, the optimal incubation time was 40 min in the  
 94 range of 10 min to 80 min.

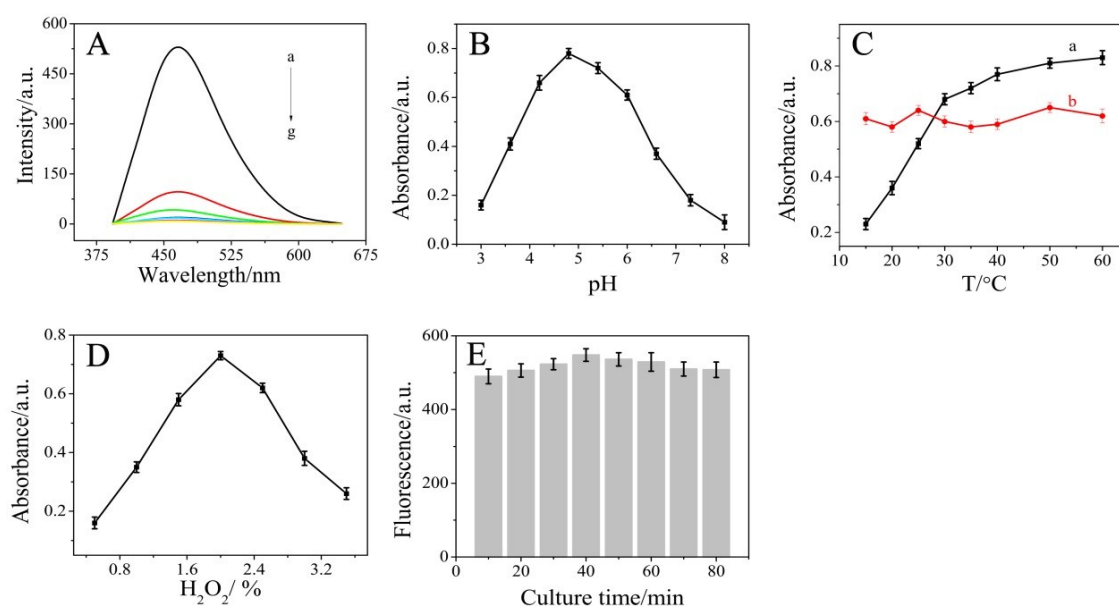

95  
 96 **Fig. S7** Effectd of the quencher (A), the pH (B), the temperature (C), the H<sub>2</sub>O<sub>2</sub> (D), and the  
 97 incubation time (E) on the property of proposed biosensor.

## 98 Calculating method of limit of detection (LOD)

99 According to the definition of detection limit in “IUPAC Compendium of  
 100 Analytical Nomenclature”, detection limit means that the lowest concentration or  
 101 quality which could be detected and possessed distinguishing signal value compared  
 102 with the blank solution. In this work, LOD expressed the lowest concentration derived  
 103 from smallest measure that could be detected by our designed biosensor, and the  
 104 equation displayed as below<sup>1</sup>:

$$105 \quad S_t - S_b = 3\sigma$$

106  $S_t$  represents the gross analysis signal,  $S_b$  represents the field blank signal, and  $\sigma$   
 107 represents the standard deviation of a blank solution (n=11).

108 The corresponding LOD expressed in concentration units is derived from the  
 109 calibration function we have got:  $\Delta I = 122.53 \times \lg [\text{let-7a}] (\mu\text{M}) + 1089.96$ , and all the  
 110 details are illustrated in table S1:

111 **Table S1.** Fluorescence intensity and corresponding information of field blank

| Fluorescence intensity of field blank |        |        |        |        |       | Average Value | Standard Deviation | LOD     |
|---------------------------------------|--------|--------|--------|--------|-------|---------------|--------------------|---------|
| 51.625                                | 68.597 | 29.828 | 39.51  | 75.264 | 56.51 | 50.13         | 15.18              | 2.99 fM |
| 62.213                                | 31.426 | 52.663 | 49.852 | 33.96  |       |               |                    |         |

112

113 **Table S2.** Fluorescence intensity of miRNA with different concentration

| c/ $\mu\text{M}$ | $10^{-8}$ | $10^{-7}$ | $10^{-6}$ | $10^{-5}$ | $10^{-4}$ | $10^{-3}$ |
|------------------|-----------|-----------|-----------|-----------|-----------|-----------|
|                  | 129.74    | 297.23    | 409.2     | 557.03    | 615.1     | 765.3     |
| I/a.u.           | 164.52    | 289.59    | 415.49    | 531.8     | 647       | 759.92    |
|                  | 141.75    | 271.85    | 391.65    | 540.97    | 642.64    | 783.06    |
| Average/a.u.     | 145.34    | 286.22    | 405.45    | 543.27    | 634.91    | 769.43    |
| Blank/a.u.       |           |           |           | 50.13     |           |           |
| $\Delta I$ /a.u. | 95.2      | 236.1     | 355.3     | 493.1     | 584.8     | 719.3     |

114

115 **Table S3.** The comparison of different miRNAs detection methods

| Method            | Linear range/fM        | Detection limit/fM | References |
|-------------------|------------------------|--------------------|------------|
| LC-MS/MS          | $10^3$ to $10^8$       | 1000               | 2          |
| Electrochemistry  | 0.1 to 100             | 0.067              | 3          |
| PEC               | 5 to 3000              | 2.26               | 4          |
| Photoluminescence | 1-60 miRNA copies      | -                  | 5          |
| Simoa             | 0 to $1.5 \times 10^6$ | 500                | 6          |
| Fluorescence      | $10$ to $10^7$         | 3                  | This work  |

116 LC-MS/MS: Liquid chromatography-tandem mass spectrometry

117 PEC: Photoelectrochemistry

118 Simoa: Single molecule arrays

119

120 **Table S4** Recovery tests of let-7a in the human serum samples by the proposed

121 biosensor and RT-PCR method

| sample | add/pM | found/pM | recovery/% | RT-PCR/pM | recovery/% |
|--------|--------|----------|------------|-----------|------------|
|        | 0.2    | 0.22     | 110.0      | 0.21      | 105.0      |
| serum  | 1.0    | 0.91     | 91.00      | 0.94      | 94.00      |
|        | 10.0   | 9.68     | 96.80      | 9.89      | 98.90      |
|        | 100.0  | 99.23    | 99.23      | 99.54     | 99.54      |

122

## 123 References

124 1. D. MacDougall and W. B. Crummett, *Anal. Chem.*, 1980, **52**, 2242-2249.



- 125 2. F. Xu, T. Yang and Y. Chen, *Anal. Chem.*, 2016, **88**, 754-763.
- 126 3. J. Zhang, L. L. Wang, M. F. Hou, Y. K. Xia, W. H. He, A. Yan, Y. P. Weng, L. P.  
127 Zeng and J. H. Chen, *Biosens. Bioelectron.*, 2018, **102**, 33-40.
- 128 4. H. Yin, Y. Zhou, B. Li, X. Li, Z. Yang, S. Ai and X. Zhang, *Sens. Actuators, B:*  
129 *Chem.*, 2016, **222**, 1119-1126.
- 130 5. J. D. Harvey, P. V. Jena, H. A. Baker, G. H. Zerbe, R. M. Williams, T. V. Galassi,  
131 D. Roxbury, J. Mittal and D. A. Heller, *Nat. Biomed. Eng.*, 2017, **1**, 697.
- 132 6. D. M. Rissin, B. Lopez-Longarela, S. Pernagallo, H. Ilyine, A. D. B. Vliegenthart,  
133 J. W. Dear, J. J. Diaz-Mochon and D. C. Duffy, *PLoS. One*, 2017, **12**, e0179669.
